# Supplementary material for: In Vitro Antidiabetic, Antioxidant, and Prebiotic Activities of the Chemical Compounds Isolated from Guizotia abyssinica
Source: MDPI journal article supplement (doi:10.3390/antiox11122482), 2022-12-16
Supplement: s1 [file s1]

## Supplementary Materials

### **List of contents**

|            |                                                  |  |
|------------|--------------------------------------------------|--|
|            |                                                  |  |
| Figure S1  | HRESIMS spectrum of compound 1                   |  |
| Figure S2  | <sup>1</sup> H-NMR spectrum of compound 1        |  |
| Figure S3  | APT spectrum of compound 1                       |  |
| Figure S4  | HSQC spectrum of compound 1                      |  |
| Figure S5  | HMBC spectrum of compound 1                      |  |
| Figure S6  | <sup>1</sup> H-NMR spectrum of compound 2        |  |
| Figure S7  | APT spectrum of compound 2                       |  |
| Figure S8  | HSQC spectrum of compound 2                      |  |
| Figure S9  | HMBC spectrum of compound 2                      |  |
| Figure S10 | <sup>1</sup> H-NMR spectrum of compound 3        |  |
| Figure S11 | IR spectrum of compound 4 (GC-1)                 |  |
| Figure S12 | HRESIMS Mass spectrum of compound 4 (GC-1)       |  |
| Figure S13 | <sup>1</sup> H-NMR spectrum of compound 4 (GC 1) |  |
| Figure S14 | APT spectrum of compound 4 (GC1)                 |  |
| Figure S15 | HRESIMS Mass spectrum of compound 5 (GC-2)       |  |
| Figure S16 | <sup>1</sup> H-NMR spectrum of compound 5 (GC 2) |  |
| Figure S17 | APT spectrum of compound 5 (GC2)                 |  |
| Figure S18 | HMBC spectrum of compound 5                      |  |
| Figure S19 | Expansion of HMBC spectrum of compound 5 (GC2)   |  |
| Figure S20 | HRESIMS Mass spectrum of compound 6 (GC-3)       |  |
| Figure S21 | <sup>1</sup> H-NMR spectrum of compound 6 (GC 3) |  |
| Figure S22 | APT spectrum of compound 6 (GC3)                 |  |
| Figure S23 | HSQC spectrum of compound 6                      |  |
| Figure S24 | HMBC spectrum of compound 6                      |  |
| Figure S25 | <sup>1</sup> H-NMR spectrum of compound 7 (GC 4) |  |
| Figure S26 | APT spectrum of compound 7 (GC4)                 |  |
| Figure S27 | <sup>1</sup> H-NMR spectrum of compound 8        |  |
| Figure S28 | APT spectrum of compound 8                       |  |
| Figure S29 | HSQC spectrum of compound 8                      |  |
| Figure S30 | HMBC spectrum of compound 8                      |  |
| Figure S31 | <sup>1</sup> H-NMR spectrum of compound 9        |  |
| Figure S32 | APT spectrum of compound 9                       |  |

## Supplementary Materials

|             |                                                                                                                  |  |
|-------------|------------------------------------------------------------------------------------------------------------------|--|
| Figure S33  | HSQC spectrum of compound 9                                                                                      |  |
| Figure S34  | HMBC spectrum of compound 9                                                                                      |  |
| Figure S35  | $^1\text{H}$ -NMR spectrum of compound 10                                                                        |  |
| Figure S36  | APT spectrum of compound 10                                                                                      |  |
| Figure S 37 | The effect of <i>G. abyssinica</i> extract and isolated compounds on accuracy of the glucose concentration assay |  |

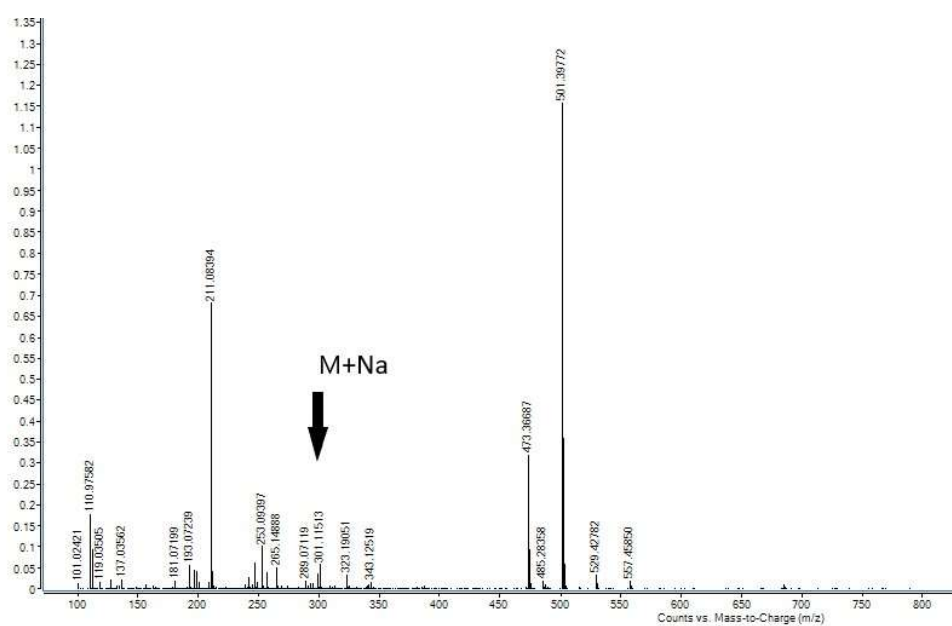

Figure S1: HRESIMS spectrum of compound 1

## Supplementary Materials

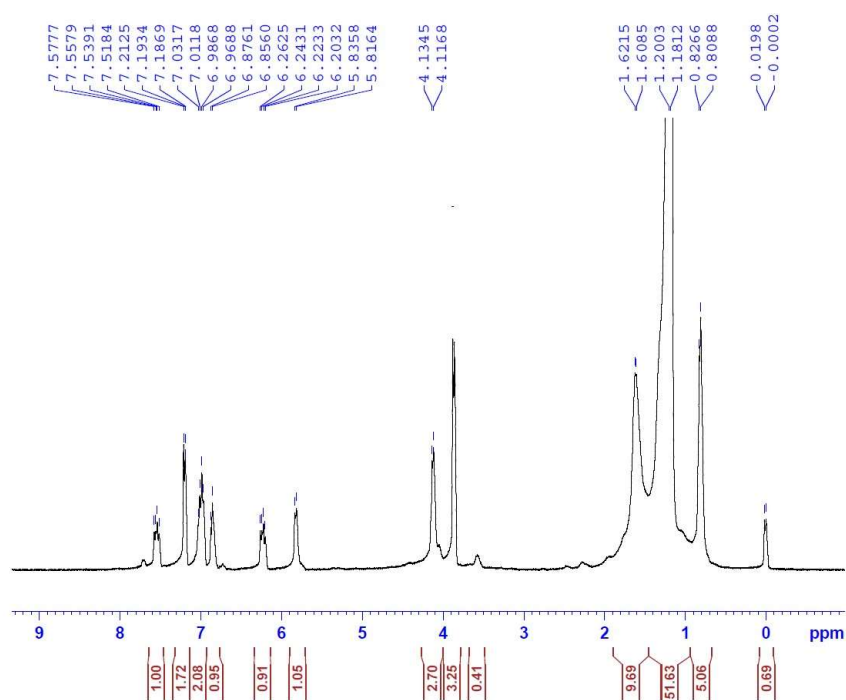

Figure S2: <sup>1</sup>H NMR spectrum of compound GU2

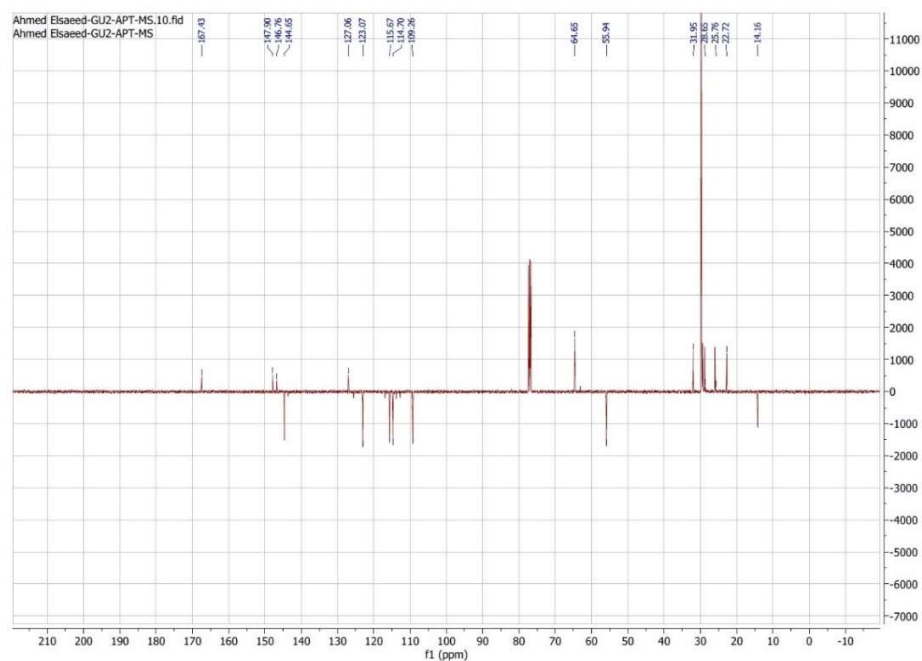

Figure S3: APT Spectrum of compound GU-2

## Supplementary Materials

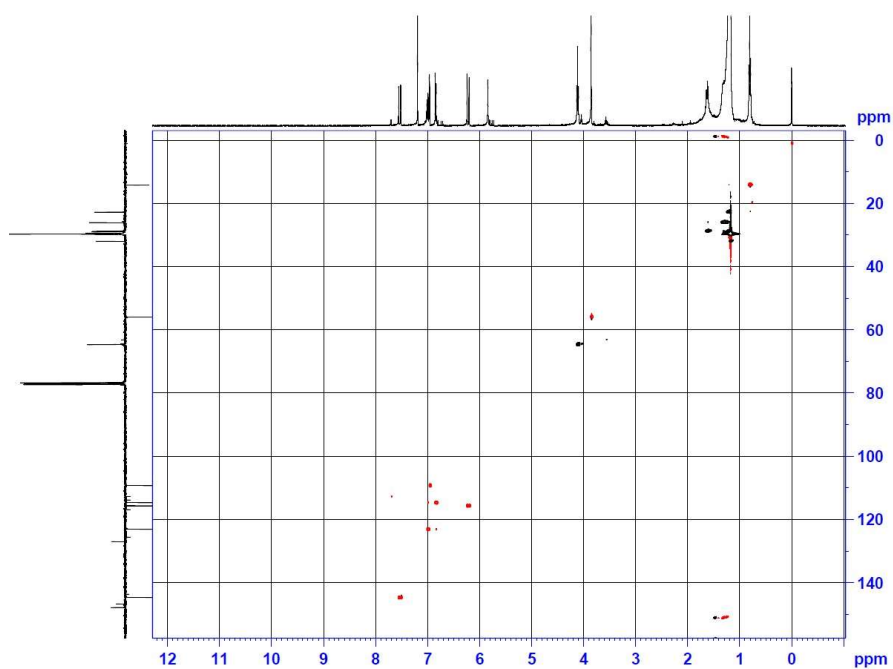

Figure S4: HSQC spectrum of compound GU2

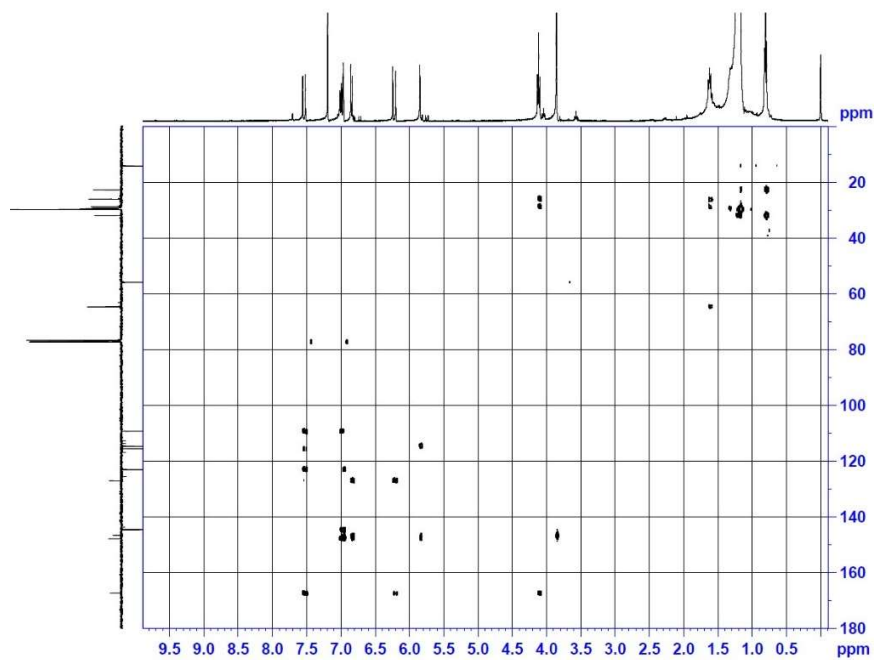

Figure S5: HMBC spectrum of compound GU2

## Supplementary Materials

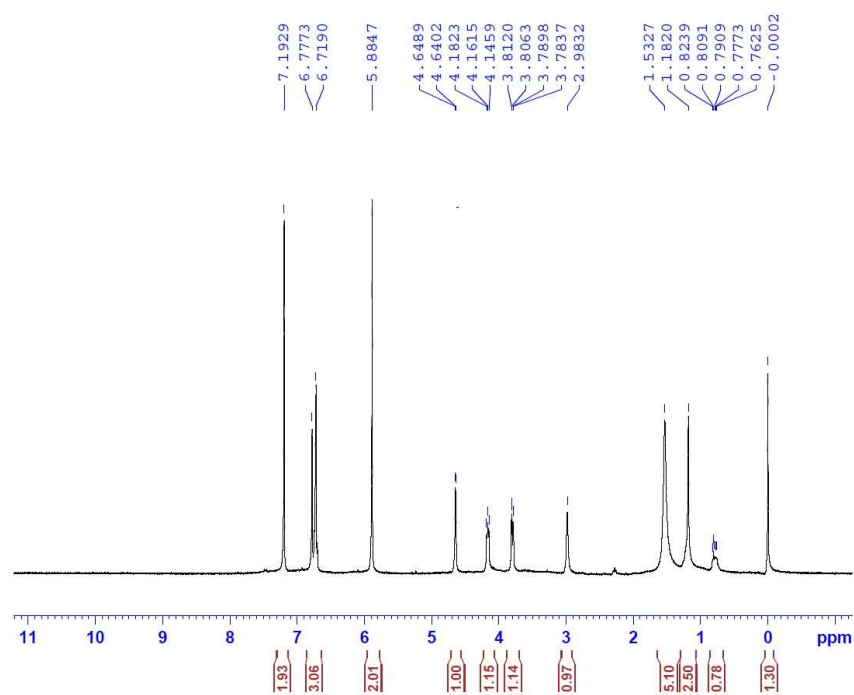

Figure S6: <sup>1</sup>H NMR spectrum of compound GU3

## Supplementary Materials

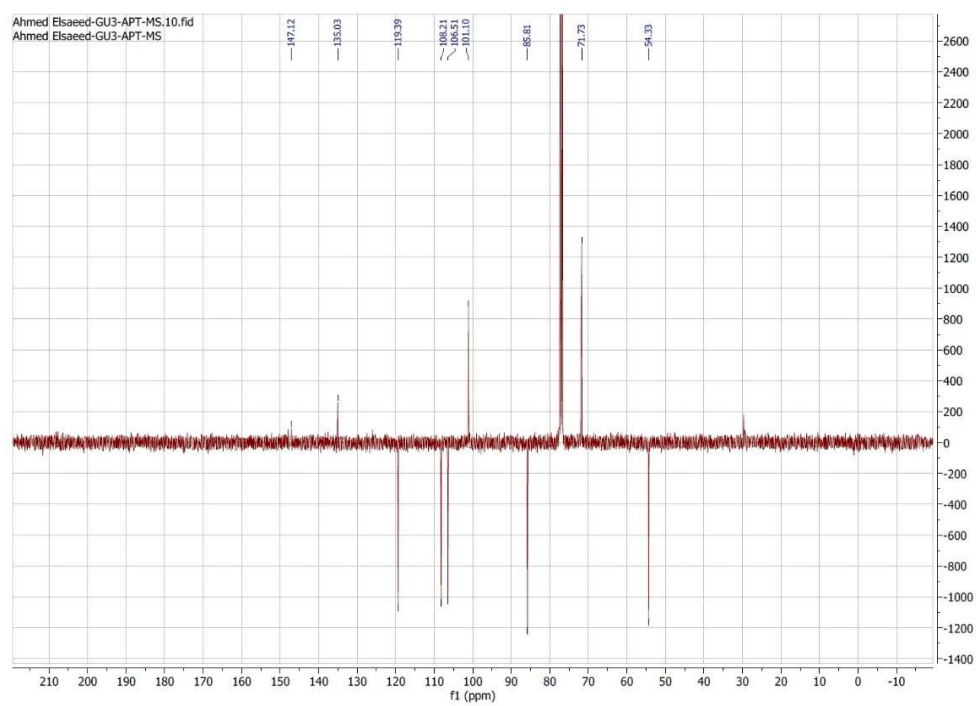

Figure S7: APT Spectrum of compound GU-3

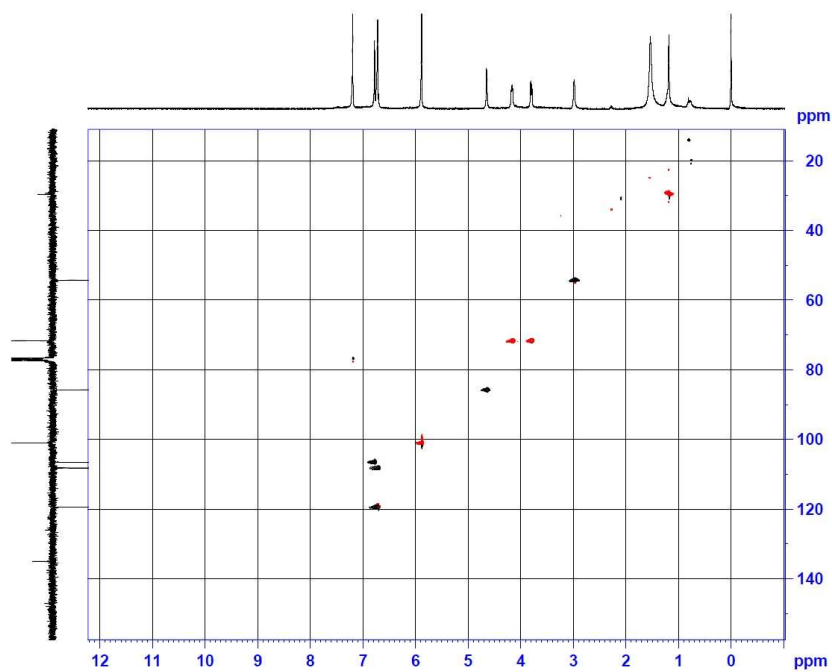

Figure S8: HSQC of compound GU-3

## Supplementary Materials

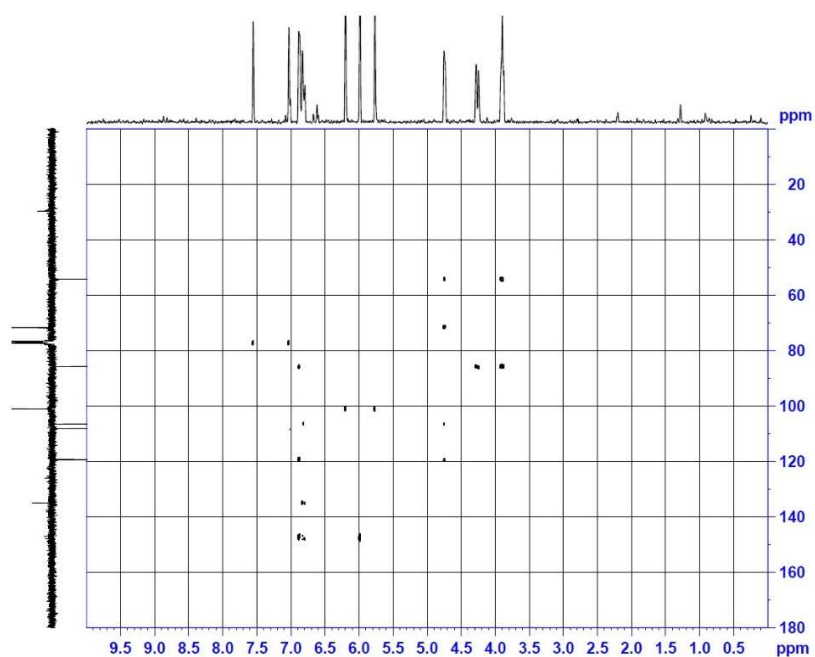

Figure S9: HMBC of compound GU-3

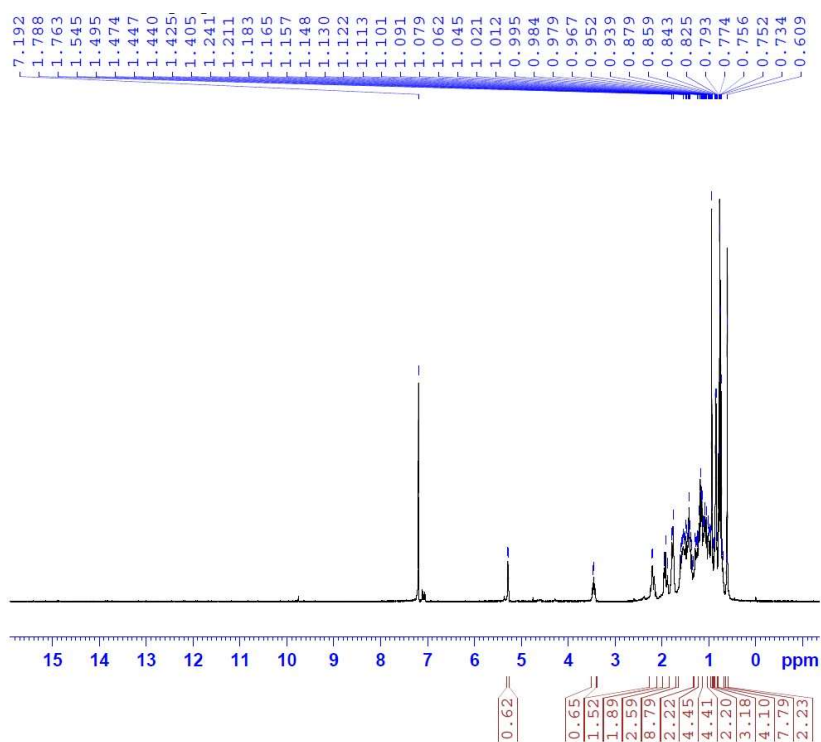

Figure S10:  $^1\text{H}$ NMR spectrum of compound 3

## Supplementary Materials

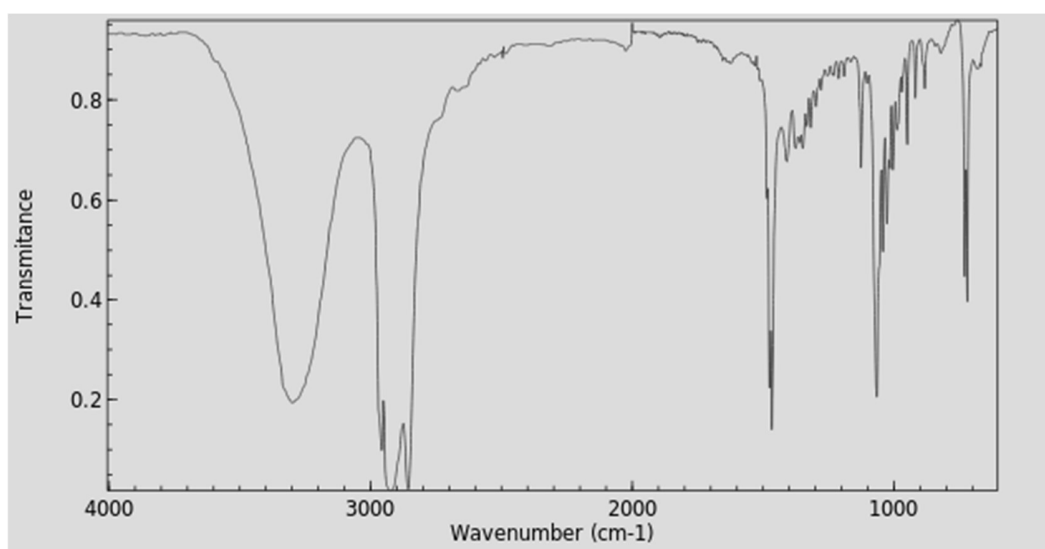

Figure S11: IR spectrum of compound 4 (GC-1)

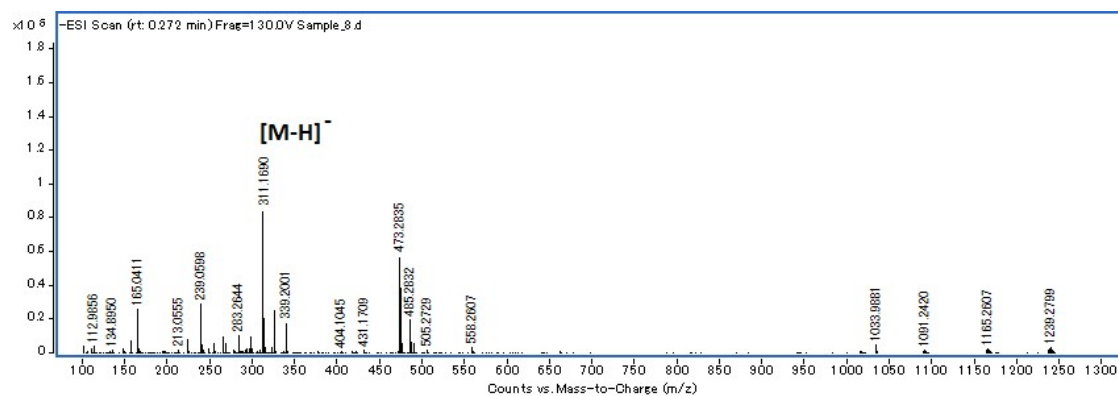

Figure S12: HRESIMS Mass spectrum of compound 4 (GC-1)



## Supplementary Materials

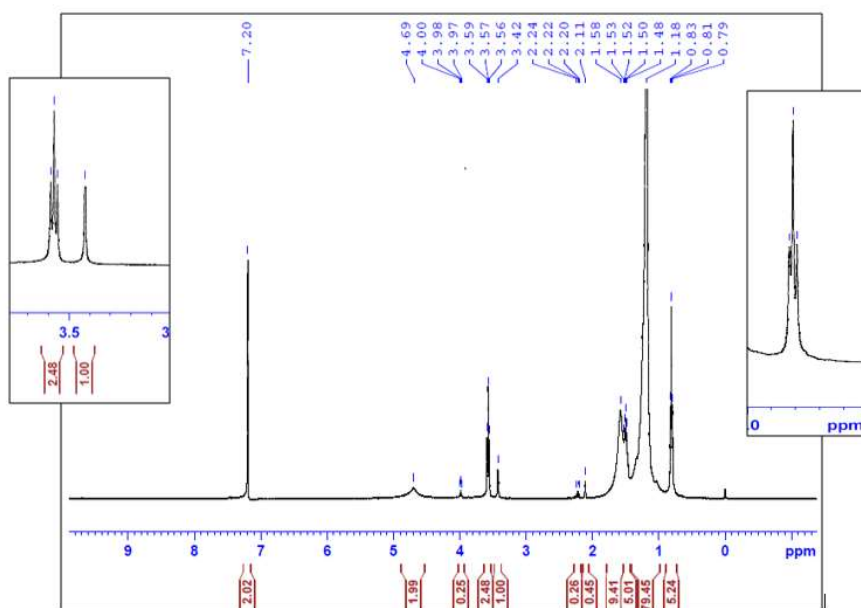

Figure S13: <sup>1</sup>H NMR spectrum of compound 4 (GC 1)

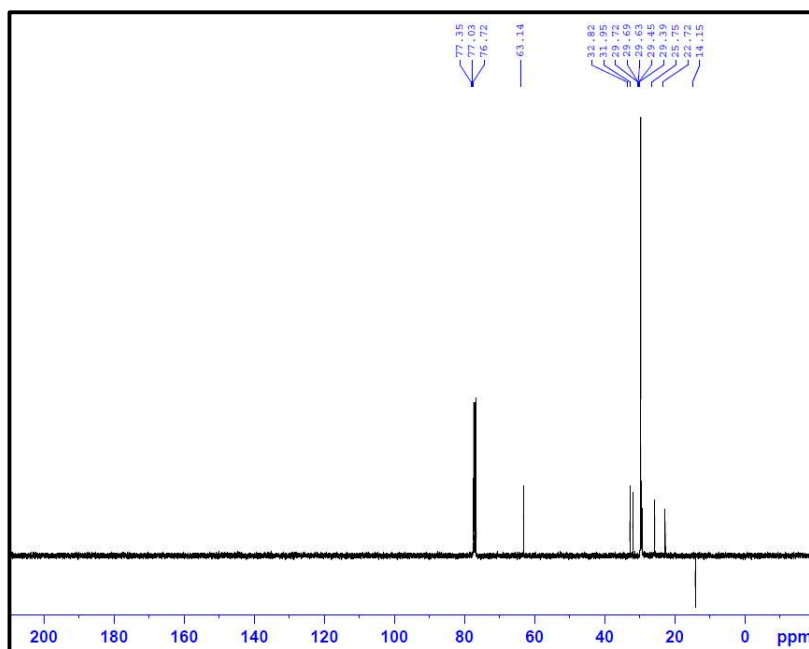

Figure S14: APT spectrum of compound 4 (GC1)

## Supplementary Materials

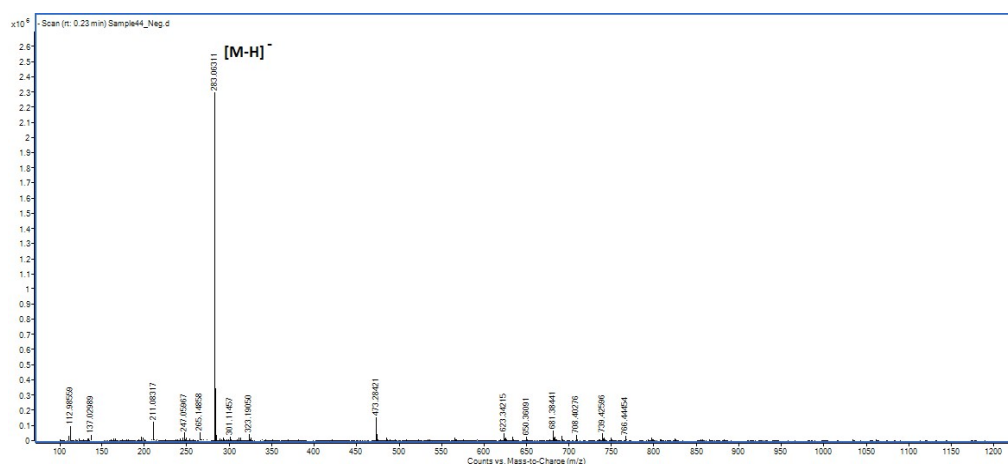

Figure S15: Mass spectrum of compound 5 (GC-2)

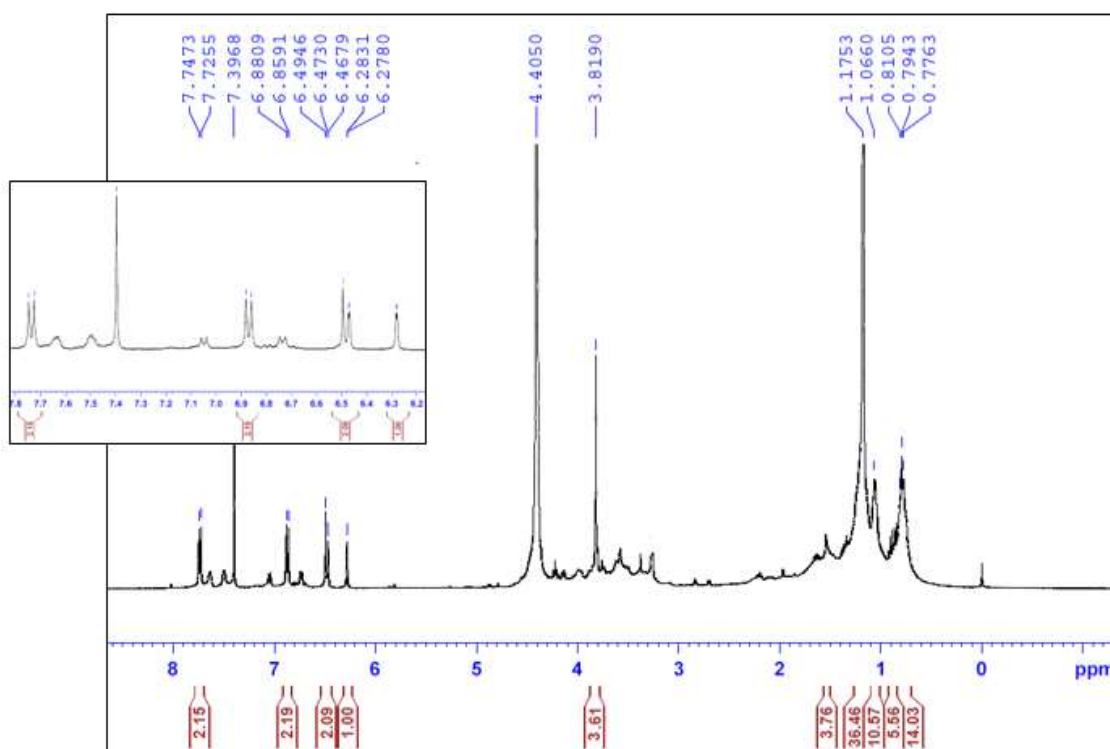

Figure S16: <sup>1</sup>H NMR spectrum of compound 5 (GC 2)

## Supplementary Materials

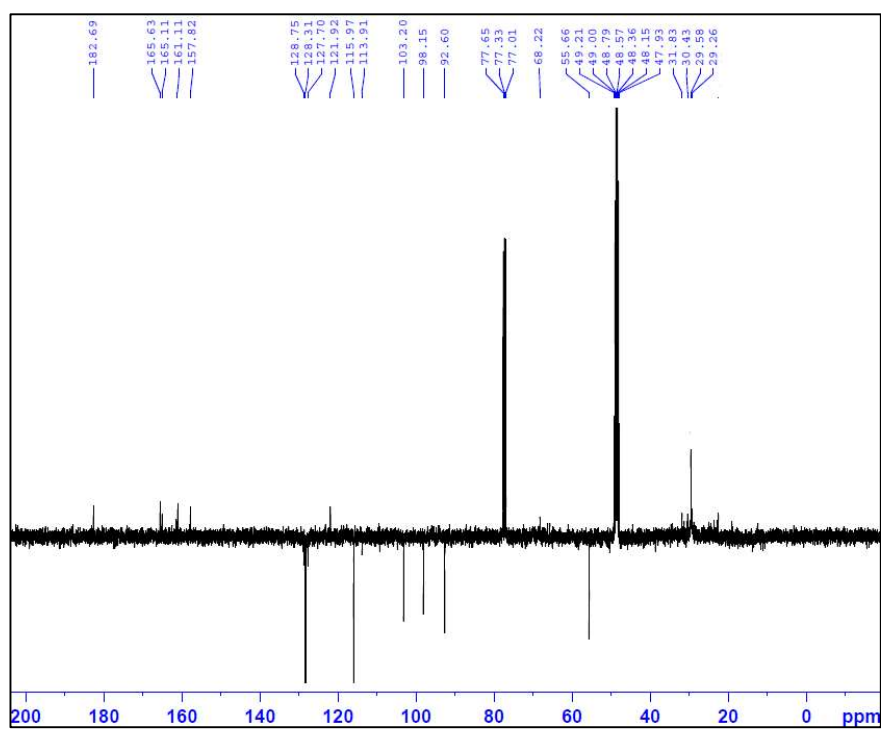

Figure S17: APT spectrum of compound 5 (GC2)

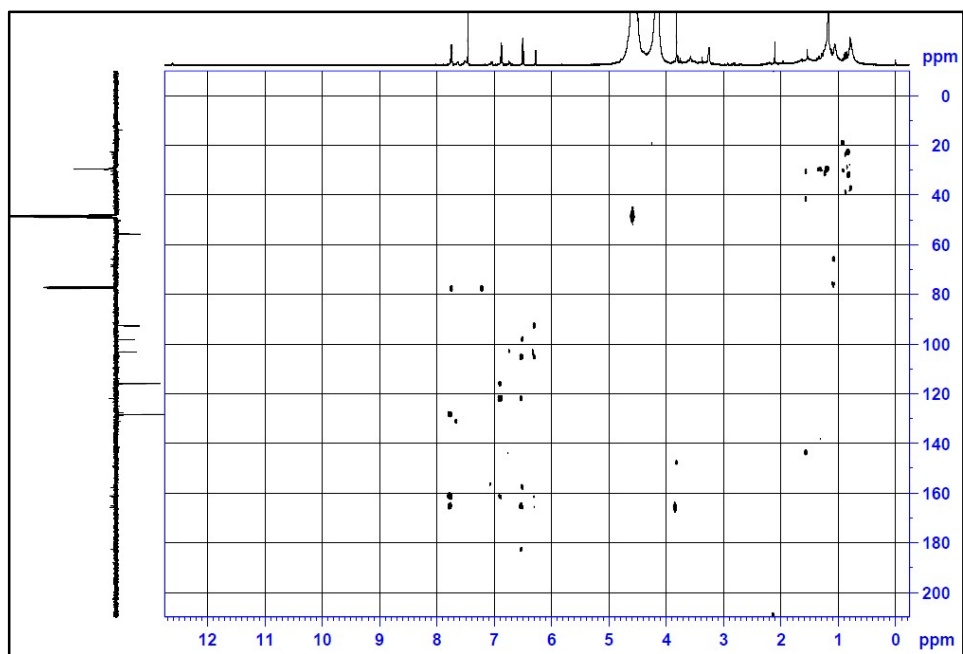

Figure S18: HMBC spectrum of compound 5 (GC2)

## Supplementary Materials

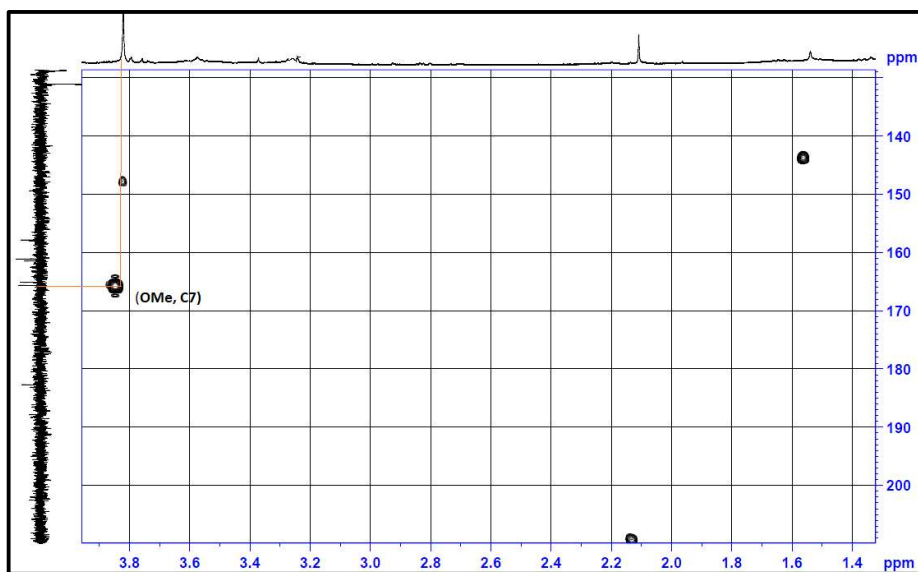

Figure S19: Expansion of HMBC spectrum of compound 5 (GC2)

## Supplementary Materials

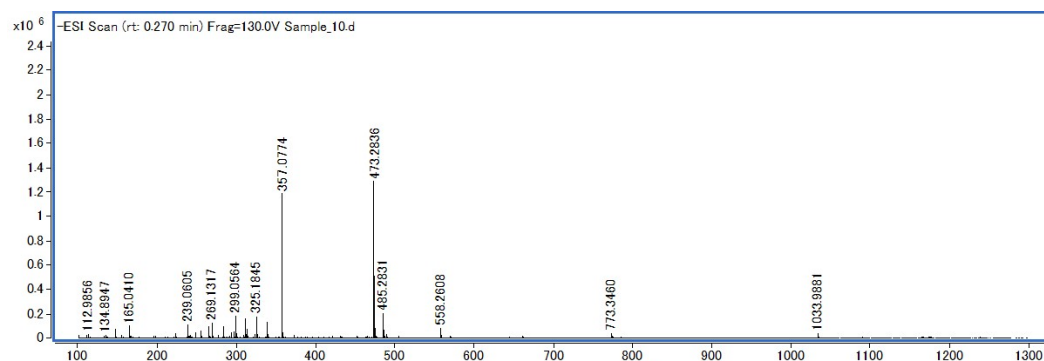

Figure S20: HRESIMS Mass spectrum of compound 6 (GC-3)

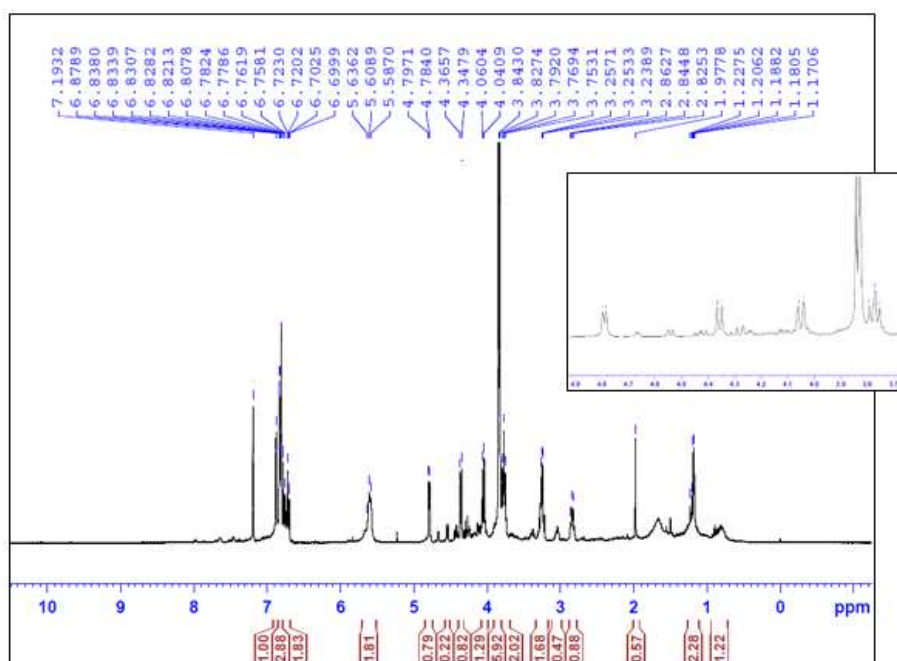

Figure S21:  $^1\text{H}$ NMR spectrum of compound 6 (GC 3)

## Supplementary Materials

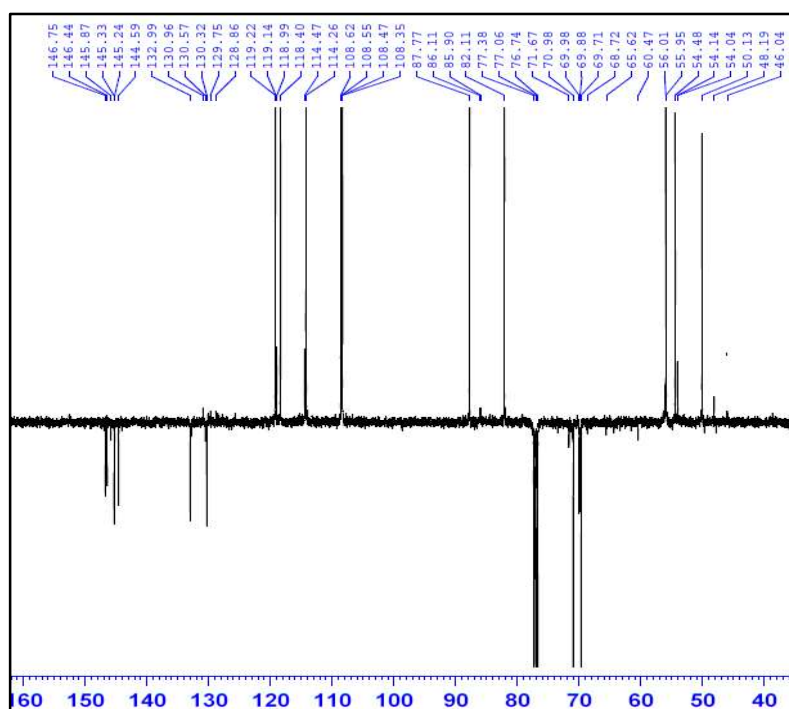

Figure S22: APT spectrum of compound 6 (GC 3)

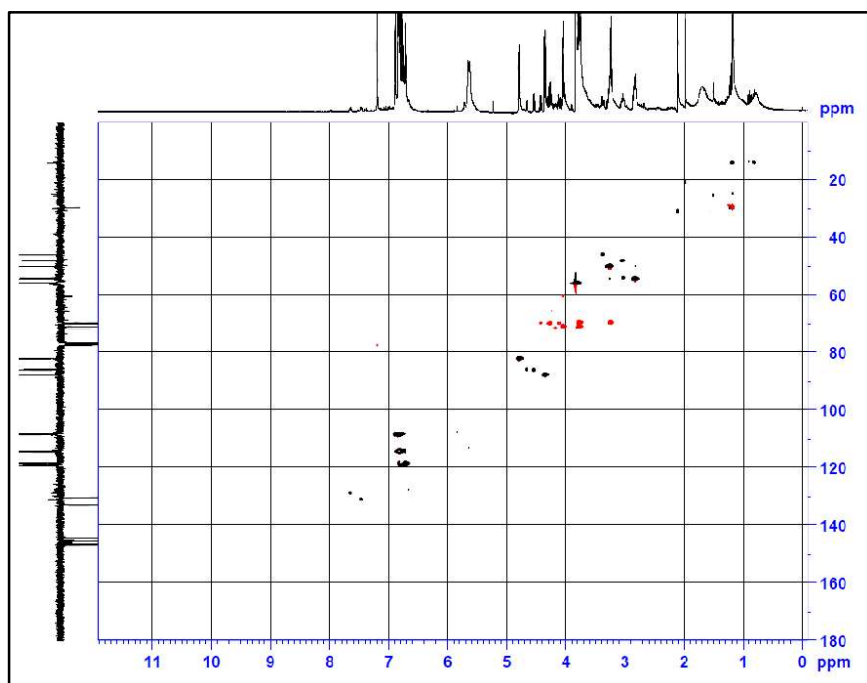

Figure S23: HSQC spectrum of compound 6 (GC 3)

## Supplementary Materials

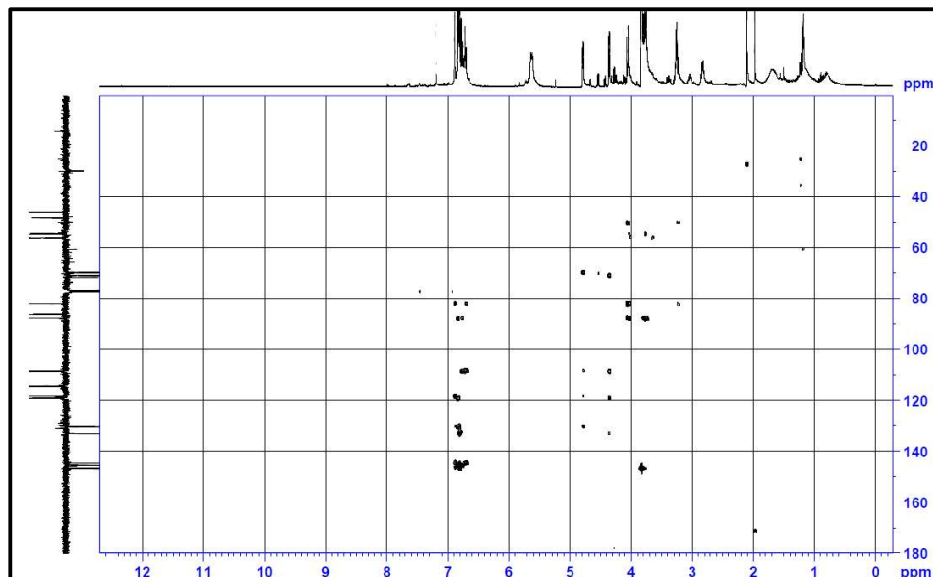

Figure S24: HMBC spectrum of compound 6 (GC 3)

## Supplementary Materials

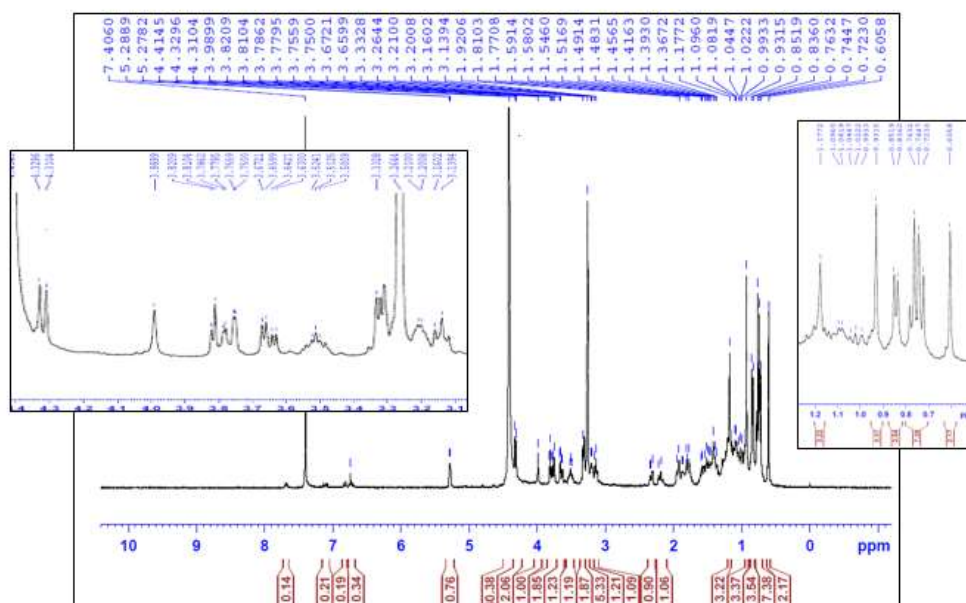

Figure S25: <sup>1</sup>H NMR spectrum of compound 7 (GC 4)

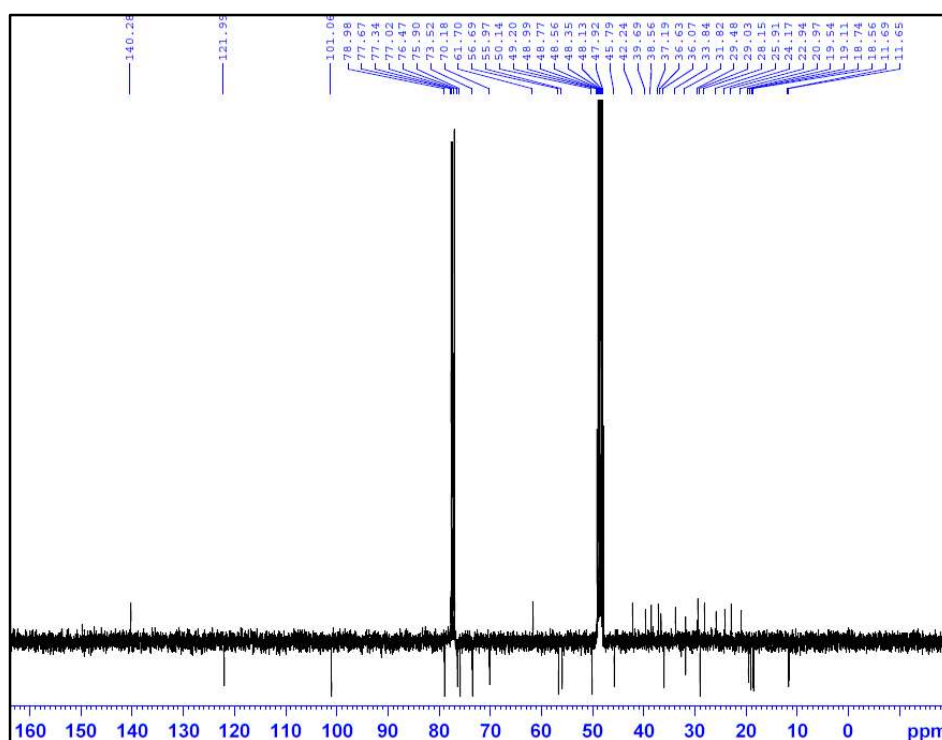

Figure S26: APT spectrum of compound 7 (GC 4)



## Supplementary Materials

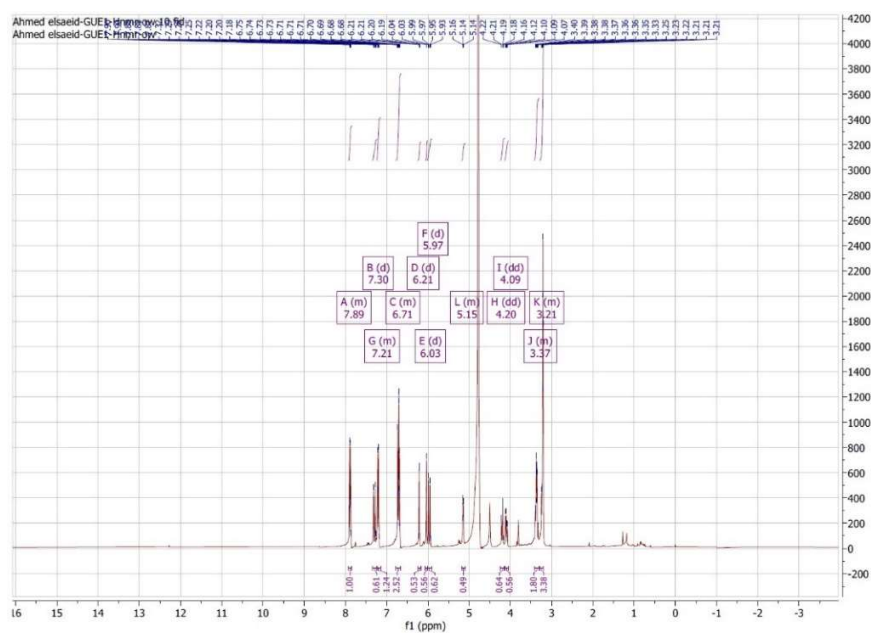

Figure S27:  $^1\text{H}$ -NMR spectrum of compound 8 GUE-1

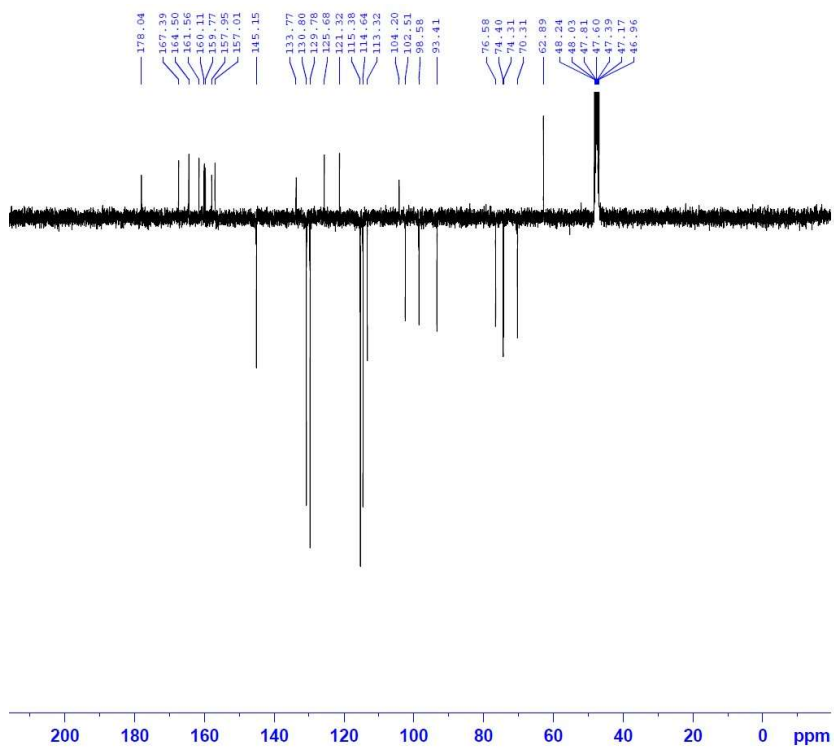

Figure S28: APT spectrum of compound 8 GUE-1

## Supplementary Materials

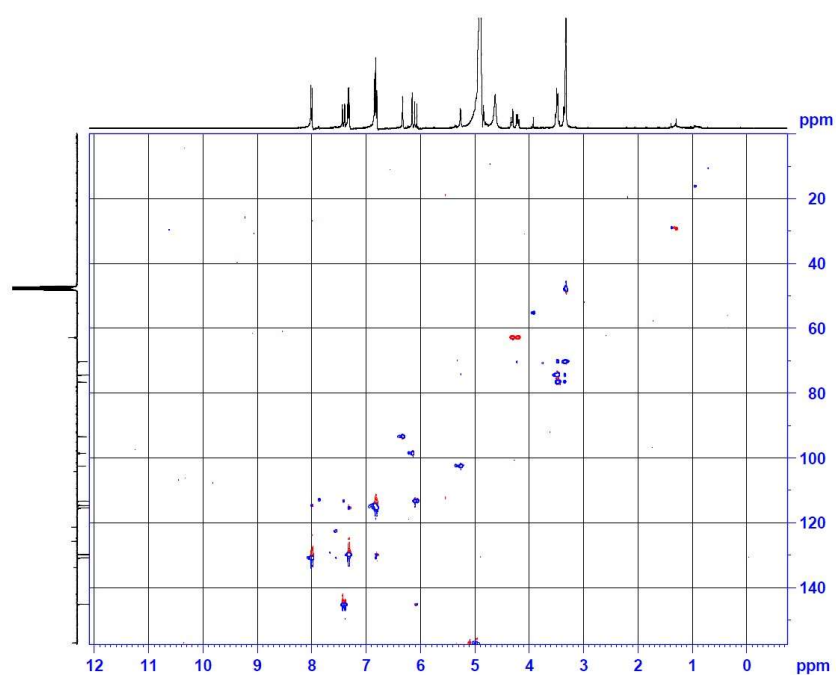

Figure S29: HSQC spectrum of compound 8 GUE-1

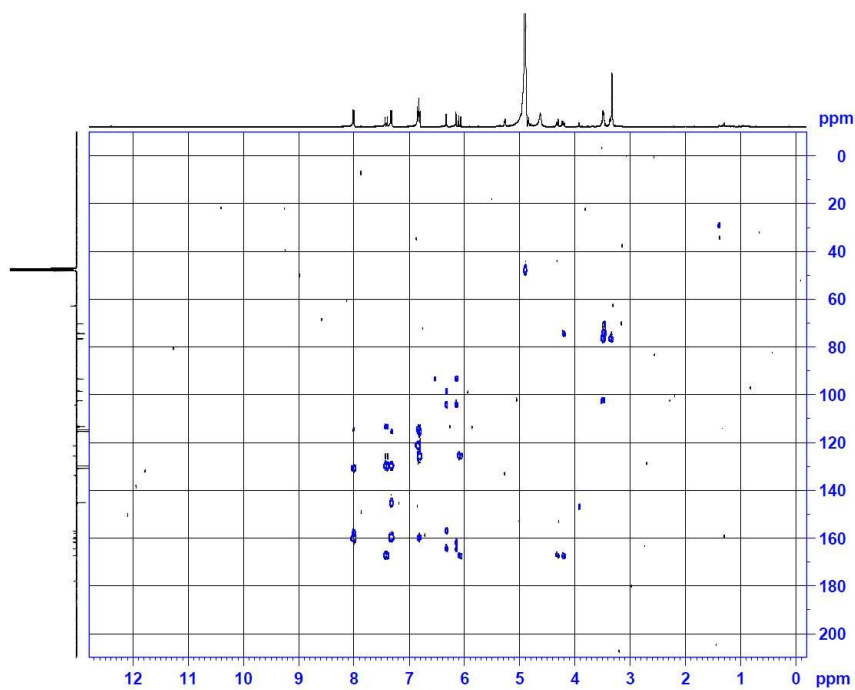

Figure S30: HMBC spectrum of compound 8 GUE-1

## Supplementary Materials

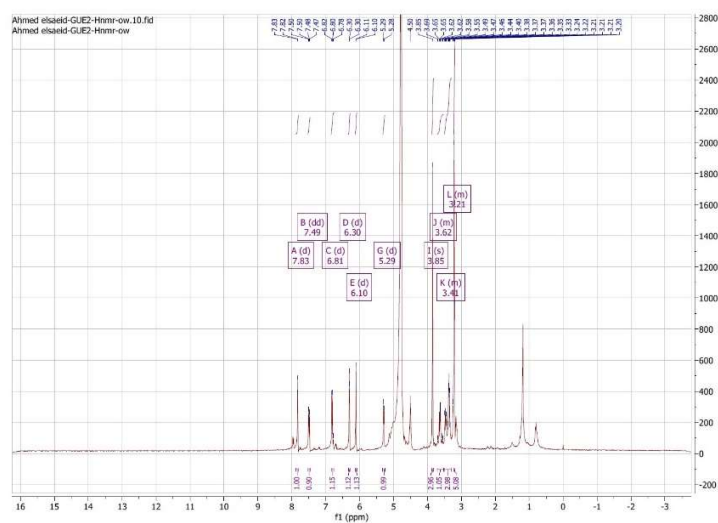

## Supplementary Materials

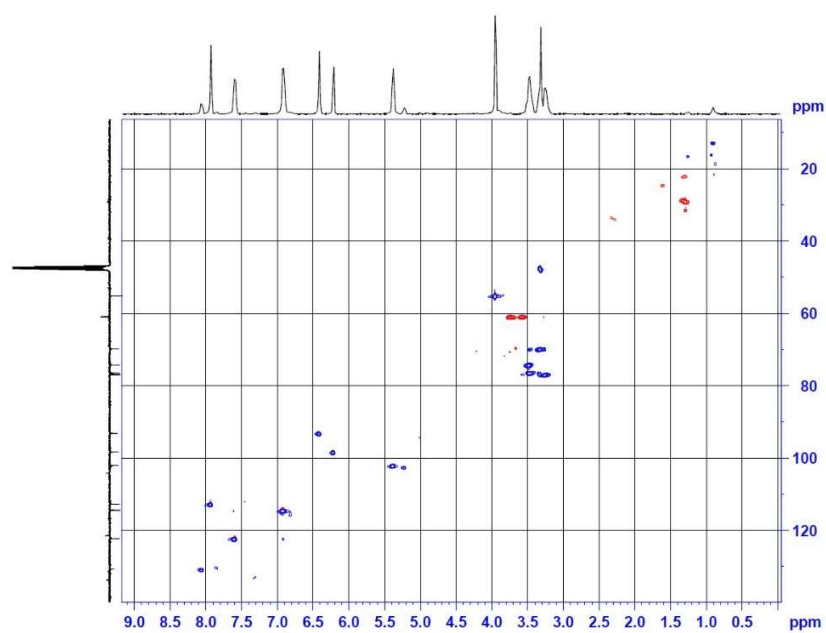

Figure S33: HSQC spectrum of compound 9 GUE2

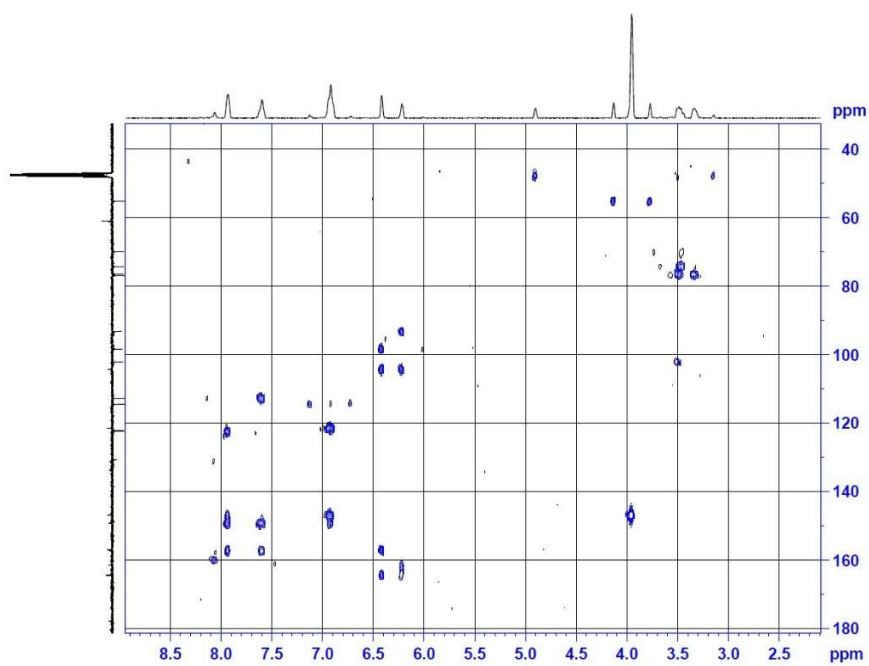

Figure S34: HMBC spectrum of compound 9 GUE2

## Supplementary Materials

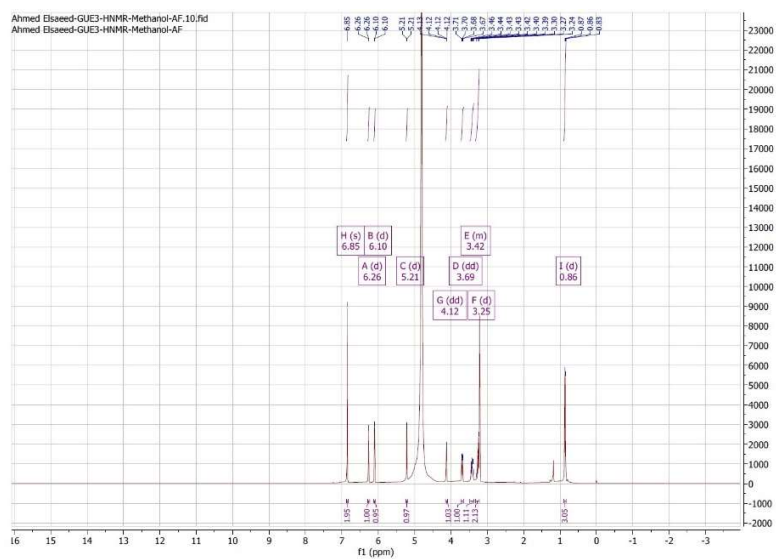

Figure S35: HNMR spectrum of compound 10 GUE3

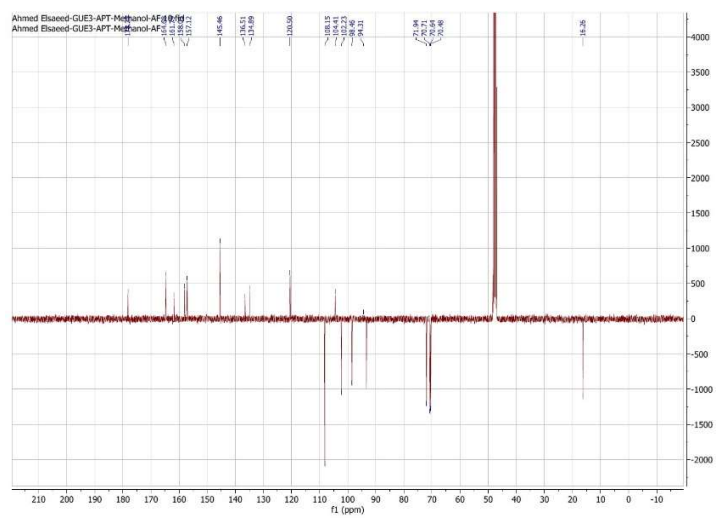

Figure S36: APT spectrum of compound 10 GUE3

## Supplementary Materials

The effect of *G. abyssinica* extract and isolated compounds on accuracy of the glucose concentration assay.

### Methods

Determination of the effect *G. abyssinica* extract and isolated compounds on accuracy of the glucose concentration assay

The Dinitrosalicylic acid reagent for Determination of glucose was used to assess the effect of tested compounds on the accuracy of glucose concentration assay of glucose. Briefly, 100  $\mu$ L of DNS reagent was added to 150  $\mu$ L of standard glucose (100 mM) and 150  $\mu$ L of sample (2 mg/mL), was boiled at 100 °C for 5 min, then cooled to room temperature. A sodium sulfate (100  $\mu$ L; 0.5% w/v) was added to obtain stable color. Absorbance of reaction mixtures was measured spectrophotometrically at 540 nm (Spectro UV–VIS Auto, UV2602, Labomed, USA). Sample in mixture without test compounds or extracts were included as negative control [33].

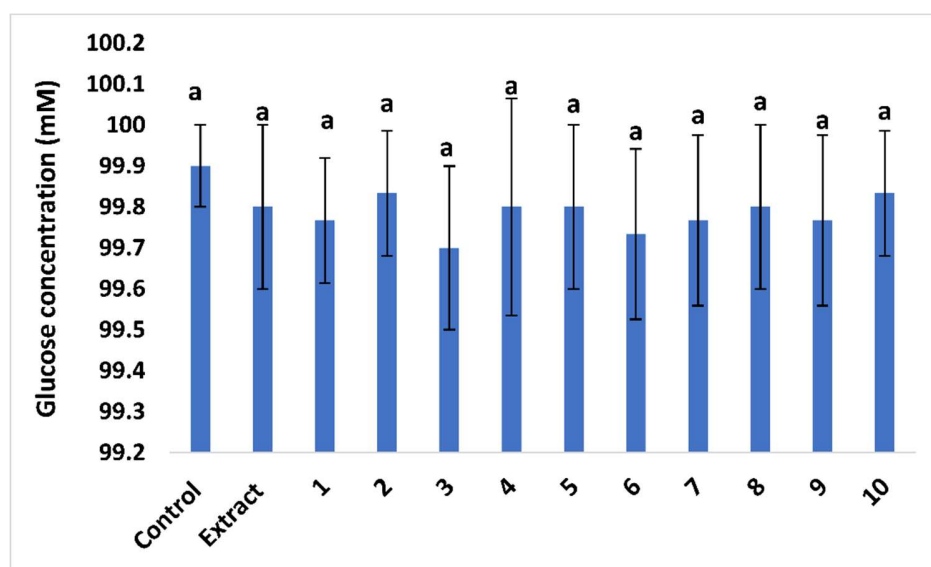

Figure S37. The effect of *G. abyssinica* extract and isolated compounds on accuracy of the glucose concentration assay. lower cases show statistical significance ( $p < 0.05$ )
